14 **Abstract**

15 The coronavirus disease COVID-19, caused by emerging SARS-CoV-2, has posed serious  
16 threats to global public health, economic and social stabilities, calling for the prompt  
17 development of therapeutics and prophylactics. In this study, we firstly verified that  
18 SARS-CoV-2 uses human ACE2 as a cell receptor and its spike (S) protein mediates high  
19 membrane fusion activity. Comparing to that of SARS-CoV, the heptad repeat 1 (HR1)  
20 sequence in the S2 fusion protein of SARS-CoV-2 possesses markedly increased  $\alpha$ -helicity  
21 and thermostability, as well as a higher binding affinity with its corresponding heptad repeat 2  
22 (HR2) site. Then, we designed a HR2 sequence-based lipopeptide fusion inhibitor, termed  
23 IPB02, which showed highly potent activities in inhibiting the SARS-CoV-2 S  
24 protein-mediated cell-cell fusion and pseudovirus infection. IPB02 also inhibited the  
25 SARS-CoV pseudovirus efficiently. Moreover, the structure and activity relationship (SAR)  
26 of IPB02 were characterized with a panel of truncated lipopeptides, revealing the amino acid  
27 motifs critical for its binding and antiviral capacities. Therefore, the presented results have  
28 provided important information for understanding the entry pathway of SARS-CoV-2 and the  
29 design of antivirals that target the membrane fusion step.

30

31 **Keywords:** SARS-CoV-2; membrane fusion; fusion inhibitor; lipopeptide

32

### 33 **Introduction**

34 In late December of 2019, a new infectious respiratory disease emerged in Wuhan, China. The  
35 pathogen was soon identified as a novel coronavirus (CoV) (1-3), which was initially termed  
36 2019-nCoV by the World Health Organization (WHO) and the disease was named COVID-19  
37 (2019 Coronavirus Disease). Because 2019-nCoV shares a high sequence identity to the  
38 previously emerged severe acute respiratory syndrome CoV (SARS-CoV) and the same cell  
39 receptor angiotensin-converting enzyme 2 (ACE2) for infection, it was renamed SARS-CoV-2  
40 by the Coronaviridae Study Group (CSG) of the International Committee on Taxonomy of  
41 Viruses (ICTV). As of 26 March 2020, a total of 416,686 confirmed COVID-19 cases,  
42 including 18,589 deaths, have been reported from 197 countries or regions  
43 ([www.who.int/emergencies/diseases/novel-coronavirus-2019](http://www.who.int/emergencies/diseases/novel-coronavirus-2019)). The pandemic has posed  
44 serious threats to global public health, economic and social stabilities, calling for the urgent  
45 development of vaccines and antiviral drugs.

46 CoVs, a large group of enveloped viruses with a single positive-stranded RNA genome,  
47 are genetically classified into four genera:  $\alpha$ -,  $\beta$ -,  $\gamma$ -, and  $\delta$ -CoVs (4, 5). The previously known  
48 six CoVs that cause human disease include two  $\alpha$ -CoVs (NL63; 229E) and four  $\beta$ -CoVs  
49 (OC43; HKU1; SARS-CoV; MERS-CoV). SARS-CoV-2 belongs to the  $\beta$ -CoV genus and  
50 represents the seventh human CoV. Like other CoVs, SARS-CoV-2 use a glycosylated,  
51 homotrimeric class I fusion spike (S) protein to gain entry into host cells (6-8). The S protein  
52 comprises of S1 and S2 subunits and exists in a metastable prefusion conformation. The S1  
53 subunit, which contains a receptor-binding domain (RBD) capable of functional folding  
54 independently, is responsible for virus binding to the cell surface receptor. A recent study

55 suggested that ACE2-binding affinity of the RBD of SARS-CoV-2 is up to 20-fold higher  
56 than that of SARS-CoV, which may contribute to the significantly increased infectivity and  
57 transmissibility (6). The receptor-binding deemed to trigger large conformational changes in the  
58 S complex, which destabilize the prefusion trimer resulting in shedding of the S1 subunit and  
59 activate the fusogenic activity of the S2 subunit (9-11). As illustrated in Fig. 1, the sequence  
60 structure of S2 contains an N-terminal fusion peptide (FP), heptad repeat 1 (HR1), heptad  
61 repeat 2 (HR2), transmembrane region (TM), and cytoplasmic tail (CT). During the fusion  
62 process, the FP is exposed and inserts into the target cell membrane, leading S2 in a  
63 prehairpin intermediate that bridges the viral and cell membranes; then, three HR1 segments  
64 self-assemble a trimeric coiled-coil and three HR2 segments fold into the grooves on the  
65 surface of the HR1 inner core, thereby resulting a six-helical bundle (6-HB) structure that  
66 drives the two membranes in close apposition for fusion.

67 Peptides derived from the HR1 and HR2 sequences of the class I viral fusion proteins  
68 have been demonstrated to possess antiviral activity through binding to the prehairpin  
69 intermediate thus blocking the formation of viral 6-HB core (12). Such are indeed the cases  
70 for emerging CoVs, including SARS-CoV and MERS-CoV (10, 13-15). In response to the  
71 outbreak of SARS-CoV, a group of HR2-based peptides that could effectively inhibit viral  
72 infection were developed (10, 15-18). Recently, a pan-CoV fusion inhibitor, designated EK1,  
73 was created, which showed inhibitory activities against diverse HCoVs, including SARS-CoV,  
74 MERS-CoV, HCoV-229E, HCoV-NL63, and HCoV-OC43 (19). However, the previously  
75 reported fusion inhibitor peptides often display low antiviral activities, with a 50% inhibitory  
76 concentration ( $IC_{50}$ ) at macromolar ( $\mu$ M) range. In the past decade, we have dedicated our

77 efforts to develop viral fusion inhibitors with improved pharmaceutical profiles, generating a  
78 group of lipopeptides with extremely potent antiviral activity (20-25). To fighting the  
79 COVID-19 pandemic, here we have applied our expertise to develop fusion inhibitors against  
80 SARS-CoV-2 infection. We found that different from that of SARS-CoV, the S protein of  
81 SARS-CoV-2 has a high cell fusion activity; then, we designed and characterized several  
82 lipopeptide-based fusion inhibitors with highly potent activities in inhibiting both  
83 SARS-CoV-2 and SARS-CoV.

84

## 85 **Results**

### 86 **SARS-CoV-2 uses ACE2 as a cell receptor and its S protein displays high fusion activity**

87 In the earlier time point, we would like to experimentally verify whether SARS-CoV-2 uses  
88 human ACE2 as a receptor for cell entry, thus we generated its S protein pseudotyped  
89 lentiviral particles. The SARS-CoV and vesicular stomatitis virus (VSV-G) pseudoviruses  
90 were also prepared for comparison. As shown in Fig. 2A, all of three pseudoviruses  
91 efficiently infected 293T cells that stably overexpress ACE2 (293T/ACE2); however, the  
92 infectivity SARS-CoV-2 and SARS-CoV dramatically decreased in 293T cells which express  
93 a low level of endogenous ACE2. As a virus control, VSV-G pseudovirus entered 293T cells  
94 even more efficiently relative its infectivity in 293T/ACE2 cells.

95 We further compared the fusion activity of viral S protein in 293T and 293T/ACE2 cells  
96 by applying a DSP-based cell-cell fusion assay. As shown in Fig. 2B, both the S proteins of  
97 SARS-CoV-2 and SARS-CoV displayed a weak fusion activity in 293T cells, but they  
98 showed significantly increased capacities to mediate cell fusion with 293T/ACE2 cells. These

99 results demonstrated that overexpression of ACE2 can promote the cell entry of both the  
100 SARS-CoV-2 and SARS-CoV pseudoviruses as well as the S protein-mediated cell-cell  
101 fusion activity, verifying the functionality of ACE2 for SARS-CoV-2.

102 In both the 239T and 293T/ACE2 target cells, we observed that the S protein of  
103 SARS-CoV-2 had a significantly increased fusion activity than the S protein of SARS-CoV.  
104 Therefore, we further compared the fusion activities of viral S proteins at different time points.  
105 As shown in Fig. 2C and 2D, the SARS-CoV S protein exhibited had no appreciable fusion  
106 activity until the effector cells and target cells were cocultured for five or six hours; in sharp  
107 contrast, the SARS-CoV-2 S protein mediated a rapid and robust cell fusion reaction, as  
108 indicated by its fusion kinetic curves especially in 293T/ACE2 cells.

109 **Compared to SARS-CoV, SARS-CoV-2 might possess an enhanced HR1-HR2**  
110 **interaction**

111 Similar to many class I fusion proteins, the interaction between the HR1 and HR2 domains of  
112 the CoV fusion protein S2 critically determines viral membrane fusion activity. Comparing to  
113 SARS-CoV, SARS-CoV-2 has a HR1 sequence with nine amino acid substitutions, and of  
114 them eight are located within the HR1 core site; whereas, two viruses share a fully identical  
115 HR2 sequence (Fig. 3A). In order to explore the mechanism underlying the highly active  
116 fusion activity of the SARS-CoV-2 S protein, we synthesized two peptides corresponding to  
117 the HR1 sequence and their secondary structures were determined by circular dichroism (CD)  
118 spectroscopy. As shown in Fig. 3B, the HR1 peptide derived from SARS-CoV-2, designated  
119 SARS2NP, showed a typical  $\alpha$ -helical conformation with the helix contents of 66%, whereas  
120 the HR1 peptide from SARS-CoV, designated SARS1NP, had  $\alpha$ -helical contents of 41%. The

121 thermal stability of the two peptides was further measured. As shown in Fig. 3C, SARS2NP  
122 and SARS1NP exhibited their melting temperature ( $T_m$ ) values of 48 and 40°C, respectively.  
123 Furthermore, we synthesized a peptide containing the HR2 sequence, termed IPB01, and its  
124 interactions with the two HR1 peptides were analyzed by CD spectroscopy. As shown in Fig.  
125 3D and E, both the SARS2NP and SARS1NP interacted with IPB01 to form complexes with  
126 typical  $\alpha$ -helical structures, having the  $T_m$  values of 75 and 68 °C, respectively. In comparison,  
127 the complex formed by SARS2NP and IPB01 was much more stable than the complex  
128 between the SARS1NP and IPB01 peptides. Taken together, these results suggested that  
129 SARS-CoV-2 might evolve an increased interaction between the HR1 and HR2 domains in  
130 the S2 fusion protein thus critically determining its high fusogenic activity.

### 131 **Cholesterylated peptide exhibits greatly increased $\alpha$ -helical stability and target-binding** 132 **affinity**

133 Emerging studies demonstrate that lipid conjugation is a viable strategy to design  
134 peptide-based viral fusion inhibitors with enhanced antiviral activity and *in vivo* stability. The  
135 resulting lipopeptides are considered to interact preferentially with the viral and cell  
136 membranes, thus raising the local concentration of the inhibitors at the site where viral fusion  
137 occurs (20-25). According to our previous experiences, here we modified the HR2 peptide  
138 IBP01 by adding a cholesterol group to its C-terminal, resulting in a lipopeptide termed  
139 IPB02, as illustrated in Fig. 1B. We first applied CD spectroscopy to determine the structural  
140 properties of the inhibitors in the absence or presence of a target mimic HR1 peptide. As  
141 shown in Fig. 4A and 4B, the unconjugated IPB01 alone was largely in a random structure  
142 and its  $T_m$  value could not be defined. By contrast, the lipopeptide IPB02 displayed markedly

143 increased helix contents with a  $T_m$  of 65 °C. Next, we assessed the helical binding stability of  
144 the inhibitors with the two target mimic peptides, SARS2NP and SARS1NP. As shown in Fig.  
145 4C to 4F, the lipopeptide-based complexes had sharply increased thermostabilities compared  
146 to the complexes formed by the template peptides. Specifically, the IPB02 and SARS2NP  
147 complex showed a  $T_m$  of 89°C, which was 14°C higher than the IPB01 and SARS2NP  
148 complex (75°C); the IPB02 and SARS1NP complex also had a  $T_m$  of 89°C, indicating a 21°C  
149 increase relative to the IPB0-based complex (68°C). Here the CD results demonstrated that  
150 the cholesterol conjugated peptide IPB02 possesses significantly increased  $\alpha$ -helical  
151 thermostability and target-binding affinity.

152 We also visualized the formed complexes by a native-polyacrylamide gel electrophoresis  
153 (PAGE) method. As shown in Fig. 5, the positively charged SARS2NP and SARS1NP might  
154 migrate up and off the gel thus no bands appeared, whereas IPB01 and IPB02 showed specific  
155 bands because they carried net negative charges. When a HR1 peptide and an inhibitor were  
156 mixed, new bands corresponding to the binding complexes emerged at the upper positions of  
157 the gel, which verified the between interactions.

### 158 **IPB02 is a highly potent fusion inhibitor of SARS-CoV-2 and SARS-CoV**

159 We next sought to determine the antiviral functions of the IPB01 and IPB02 peptides. Firstly,  
160 their inhibitory activities on S protein-mediated cell-cell fusion were examined by the  
161 DSP-based cell fusion assay as described above. As shown in Fig. 6A and Table 1, both of  
162 IPB01 and IPB02 potently inhibited the cell fusion mediated by the S protein of SARS-CoV-2,  
163 with mean  $IC_{50}$  values of 0.022 and 0.025  $\mu$ M, respectively. Then, we conducted the  
164 single-cycle infection assay to measure the inhibitory activities of the peptides on



165 pseudoviruses. Surprisingly, the unconjugated peptide IPB01 showed very weak or marginal  
166 activities in inhibiting the SARS-CoV-2 (Fig. 6B) and SARS-CoV (Fig. 6C) pseudoviruses;  
167 however, the lipopeptide IPB02 inhibited the two viruses with  $IC_{50}$  at 0.08 and 0.251  $\mu$ M,  
168 respectively (Table 1). As expected, IPB01 and IPB02 had no inhibitory activity against a  
169 control virus (VSV-G), indicating their antiviral specificities. Therefore, we conclude that  
170 IPB02 is a highly potent fusion inhibitor of SARS-CoV-2 and SARS-CoV.

### 171 **Structural and functional characterization of lipopeptide inhibitors**

172 In light of the high binding and inhibitory activities with IPB02, we next focused on  
173 characterizing its structure-activity relationship (SAR). To this end, a panel of new  
174 lipopeptides was generated by sequence truncation or extension, and their antiviral capacities  
175 were examined. As shown in Table 1, IPB03 and IPB04, which had an N-terminal amino acid  
176 truncation, still maintained a very high potency in inhibiting the cell fusion activity of the  
177 SARS-CoV-2 S protein, but they exhibited an obviously reduced activity to block the cell  
178 entry activity of both the SARS-CoV-2 and SARS-CoV pseudoviruses. A further N-terminal  
179 truncation, as indicated by IPB05 and IPB06, would result in the inhibitors inactive at a high  
180 concentration. By adding six amino acids of the membrane proximal external sequence  
181 (MPES) to the C-terminal of IPB05, the resulting peptide IPB07 regained the antiviral activity,  
182 demonstrating the importance of MPES in the design of such CoV fusion inhibitors.  
183 Differently, IPB08 was a C-terminally truncated inhibitor with IPB02 as a template, but its  
184 antiviral function was markedly impaired, underscoring the roles of C-terminal residues in  
185 IPB02. On the basis of the results above, it was expected that IPB09 with two terminal  
186 truncations was antivirally inactive. Indeed, the CD data suggested that both the N- and

187 C-terminal sequences contributed critically to the binding of the inhibitors (Table 1). By  
188 comparing IPB03 and IPB04, it revealed that three amino acids (Ile-Asn-Ala) in the  
189 N-terminal of IPB03 reversely impaired the inhibitor binding.

190

## 191 **Discussion**

192 In 2002, SARS-CoV suddenly emerged in Guangzhou, China, and its subsequent global  
193 spread was associated with 8096 cases and 774 deaths. To fight against SARS-CoV, we took  
194 immediate actions with multiple research projects and achieved significant findings. First, we  
195 identified several viral antigens suitable for the development of diagnostic tools (26-28);  
196 second, we proposed for the first time that the S protein receptor-binding domain (RBD) can  
197 serve as an ideal subunit vaccine for emerging CoVs (29-40); third, we also reported the first  
198 peptide-based SARS-CoV fusion inhibitor with potential therapeutic and preventive efficacies  
199 (10).

200 To fight against the current pandemic of COVID-19 caused by SARS-CoV-2, we sprang  
201 into action to develop effective therapeutics and prophylactics. In this study, we focused on  
202 developing viral fusion inhibitor peptides with a potent and broad antiviral activity. Firstly,  
203 our experiments verified that like SARS-CoV, SARS-CoV-2 also uses human  
204 angiotensin-converting enzyme 2 (ACE2) as a receptor for cell entry and infection; however,  
205 the S protein of SARS-CoV-2 has much higher activity to mediate cell-cell fusion. By  
206 analyzing the secondary structure and thermostability with CD spectroscopy, we found that  
207 the HR1 peptide derived from the S2 fusion protein of SARS-CoV-2 displays much higher  
208  $\alpha$ -helicity and thermostability than the HR1 peptide from the S2 fusion protein of SARS-CoV.  
209 Consistently, both the  $\alpha$ -helical contents and melting temperature of the SARS-CoV-2 HR1

210 peptide complexed with a HR2-derived peptide are higher than that of the SARS-CoV HR1  
211 peptide-based complex, suggesting a more strong interaction between the HR1 and HR2 sites  
212 for SARS-CoV-2 over that of SARS-CoV. According to our experiences in designing of  
213 lipopeptide fusion inhibitor against HIV, we modified the HR2 sequence-derived peptide  
214 IPB01 with a cholesterol group, resulting in the lipopeptide IPB02 with highly potent  
215 activities in inhibiting SARS-CoV-2 and SARS-CoV pseudoviruses as well as the S  
216 protein-mediated cell-cell fusion activity. Moreover, the structure-activity relationship (SAR)  
217 of the HR2 sequence-based fusion inhibitors were characterized by applying a panel of  
218 truncated lipopeptides, which certified the roles of both the N-and C-terminal amino acid  
219 sequences in the design of a potent inhibitor against emerging CoVs. Combined, these data  
220 provide important information for understanding the fusion mechanism of emerging CoVs  
221 and for the development of antivirals that target the membrane fusion step.

222 Cell entry of CoVs depends on binding of the viral S proteins to cellular receptors and on  
223 S protein priming by host cell proteases (41-44). Previous studies demonstrated that  
224 SARS-CoV enters into targeting cells mainly via an endosome membrane fusion pathway  
225 where its S protein is cleaved by endosomal cysteine proteases cathepsin B and L (CatB/L)  
226 and activated (45). However, SARS-CoV also employs the cellular serine protease TMPRSS2  
227 for S protein priming, and especially, TMPRSS2 but not CatB/L is essential for viral entry  
228 into primary target cells and for viral spread in the infected host (43, 46-48). It was also found  
229 that introducing a furin-recognition site between the S1 and S2 subunits could significantly  
230 increase the ability of SARS-CoV S protein to mediate cellular membrane surface infection  
231 (49). Differently, SARS-CoV-2 induces typical syncytium formation in infected cells,

232 suggesting that it mainly utilizes a plasma membrane fusion pathway for cell entry. Sequence  
233 analyses revealed that SARS-CoV-2 harbors the S1/S2 cleavage site in its S protein, although  
234 its roles in S protein-mediated membrane fusion and viral life-cycle need to be characterized.  
235 One can speculate that furin-mediated precleavage at the S1/S2 site in infected cells might  
236 promote subsequent TMPRSS2- dependent cell entry, the case for MERS-CoV (50, 51). A  
237 recent study found that SARS-CoV-2 employs TMPRSS2 for S protein priming and a  
238 TMPRSS2 inhibitor approved for clinical use can block entry (52). For most viruses, the  
239 plasma membrane fusion pathway is more efficient than the endosome membrane fusion  
240 pathway because the latter is prone to activating the host antiviral immunity (53, 54). In this  
241 study, we have not only verified ACE2 as a cell receptor but also demonstrated that the  
242 SARS-CoV-2 S protein evolves a significantly increased fusogenic activity relative to the S  
243 protein of SARS-CoV. Although our studies have also shown that the HR1 mutations in the  
244 S2 protein can greatly enhance the HR1-HR2 interaction thus might be a crucial factor to  
245 determine the fusion activity of the SARS-CoV-2 S protein, other players in the fusion  
246 pathways may contribute in coordination with that. We also observed that the HR2-derived  
247 inhibitors were more effective in inhibiting the S protein-mediated cell fusion than their  
248 inhibitions on pseudoviruses, implying that SARS-CoV-2 might also adopt the endosome  
249 entry pathway. Indeed, it was recently found that cathepsin L is required for the cell entry of  
250 SARS-CoV-2 and teicoplanin, a glycopeptide antibiotic, can specifically inhibit the entry (55,  
251 56).

252 Drug repurposing represents as a viable drug discovery strategy from existing drugs with  
253 knowledge on safety profile, side effects, posology and drug interactions, which could shorten

254 the time and reduce the cost compared to *de novo* drug discovery. In the emergency of the  
255 COVID-19 pandemic, a group of nonspecific antiviral drugs, including interferon (IFN),  
256 lopinavir/ritonavir, chloroquine, remdesivir (GS-5734), and favipiravir (T-705) were quickly  
257 screened with anti-SARS-CoV-2 activity and they have been used to treat infected patients  
258 (57, 58). Very recently, a clinical study suggested that combination of hydroxychloroquine  
259 and azithromycin would provide synergistic effects in treated COVID-19 patients (59).  
260 Nonetheless, development of specific drugs for emerging coronaviruses, including  
261 SARS-CoV-2 and SARS-CoV, is highly required and has perspective for the long run. We  
262 believe that the newly developed lipopeptide IPB02 represents an ideal candidate for future  
263 optimization development.

264

## 265 **Materials and methods**

### 266 **Peptide synthesis**

267 Peptides were synthesized on rink amide 4-methylbenzhydrylamine (MBHA) resin using a  
268 standard solid-phase 9-fluorenylmethoxycarbonyl (Fmoc) protocol as described previously  
269 (20). Lipopeptides were produced by conjugating cholesterol succinate monoester to the  
270 C-terminal lysine residue. All peptides were N-terminally acetylated and C-terminally  
271 amidated, and they were purified by reverse-phase high-performance liquid chromatography  
272 (HPLC) to more than 95% homogeneity and characterized with mass spectrometry.

### 273 **Single-cycle infection assay**

274 Infectivity of SARS-CoV-2, SARS-CoV, and vesicular stomatitis virus (VSV) on 293T cells  
275 or 293T cells stably expressing human ACE2 (293T/ACE2) was determined by a single-cycle

276 infection assay as described previously (60). To produce pseudoviruses, HEK293T cells were  
277 cotransfected with a backbone plasmid (pNL4-3.luc.RE) that encodes an Env-defective,  
278 luciferase reporter-expressing HIV-1 genome and a plasmid expressing the S protein of  
279 SARS-CoV-2 or SARS-CoV or the G protein of VSV. Cell culture supernatants containing the  
280 released virions were harvested 48 h post-transfection, filtrated and stored at  $-80^{\circ}\text{C}$ . To  
281 measure the inhibitory activity of peptide inhibitors, pseudoviruses were mixed with an equal  
282 volume of a serially 3-fold diluted peptide and incubated at  $37^{\circ}\text{C}$  for 30 min. The mixture was  
283 then added to 293T/ACE2 cells at a density of  $10^4$  cells/100  $\mu\text{l}$  per plate well. After cultured  
284 at  $37^{\circ}\text{C}$  for 48 h, the cells were harvested and lysed in reporter lysis buffer, and luciferase  
285 activity was measured using luciferase assay reagents and a luminescence counter (Promega,  
286 Madison, WI, USA). The 50% inhibitory concentration ( $\text{IC}_{50}$ ) was calculated as the final cell  
287 culture concentration of an inhibitor that caused a 50% reduction in relative luminescence  
288 units (RLU) compared to the level of the virus control subtracted from that of the cell control.

### 289 **Cell-cell fusion assay**

290 A dual split-protein (DSP)-based fusion cell-cell assay was used to detect the SARS-CoV-2 or  
291 SARS-CoV S protein-mediated cell-cell fusion activity and the inhibitory activity of peptides  
292 as described previously (60). Briefly, a total of  $1.5 \times 10^4$  293T cells (effector cells) were seeded  
293 in a 96-well plate and  $1.5 \times 10^5/\text{mL}$  of 293T or 293T/ACE2 cells (target cells) were seeded in a  
294 10-cm culture dish, and then incubated at  $37^{\circ}\text{C}$ . On the next day, effector cells were  
295 cotransfected with a S protein-expressing and a  $\text{DSP}_{1-7}$  plasmid, target cells were transfected  
296 with a  $\text{DSP}_{8-11}$  plasmid, and then the cells were incubated at  $37^{\circ}\text{C}$ . After 24 h, the effector  
297 cells were added with a serially 3-fold diluted peptide and incubated for 1 h; the target cells

298 were resuspended at  $3 \times 10^5$ /mL in prewarmed culture medium that contains EnduRen live cell  
299 substrate (Promega) at a final concentration of 17 ng/ml and incubated for 30 min. Then,  
300  $3 \times 10^4$  of target cells were then transferred to the effector cells and the mixed cells were spun  
301 down to maximize cell-cell contact. After incubation for 2 h, luciferase activity was measured  
302 and IC<sub>50</sub> values were calculated as described above.

### 303 **Circular dichroism (CD) spectroscopy**

304 The secondary structure and thermal stability of peptides or peptide complexes were  
305 determined by CD spectroscopy as described previously (60). Briefly, a peptide was dissolved  
306 in phosphate-buffered saline (PBS; pH 7.2) with a final concentration of 10  $\mu$ M and incubated  
307 at 37 °C for 30 min. CD spectra were acquired on a Jasco spectropolarimeter (model J-815)  
308 using a 1 nm bandwidth with a 1 nm step resolution from 195 to 270 nm at room temperature.  
309 Spectra were corrected by subtracting a solvent blank, and  $\alpha$ -helical content was calculated  
310 from the CD signal by dividing the mean residue ellipticity  $[\theta]$  at 222 nm, with a value of  
311  $-33,000 \text{ deg cm}^2 \text{ dmol}^{-1}$  corresponding to 100% helix. Thermal denaturation was conducted  
312 by monitoring the ellipticity change at 222 nm from 20 to 98°C at a rate of 2°C/min, and  
313 melting temperature ( $T_m$ ) was defined as the midpoint of the thermal unfolding transition.

### 314 **Native-polyacrylamide gel electrophoresis (N-PAGE)**

315 N-PAGE was performed to determine the interaction between a SARS-CoV2 or SARS-CoV S  
316 protein HR1-derived peptide and a HR2-derived peptide as described previously (61). Briefly,  
317 a HR1 peptide was mixed with a HR2 peptide at a final concentration of 40  $\mu$ M and incubated  
318 at 37°C for 30 min. The mixture was added with Tris–glycine native sample buffer at a ratio  
319 of 1 : 1 and then loaded onto a 10 x 1.0-mm Tris-glycine gel (20%) at 25  $\mu$ l/well. Gel

320 electrophoresis was done with 100V constant voltage at 4 °C for 3 h. The gel was then stained  
321 with Coomassie blue and imaged with a Bio-Rad imaging system (Bio-Rad, Hercules,  
322 California, USA).

323

## 324 **Acknowledgements**

325 We thank Zene Matsuda at the Institute of Medical Science, University of Tokyo, for  
326 providing plasmids and cells for DSP-based cell-cell fusion assay. This work was supported  
327 by grants from the National Natural Science Foundation of China (81630061) and the CAMS  
328 Innovation Fund for Medical Sciences (2017-I2M-1-014).

329

## 330 **References**

- 331 1. Wu F, Zhao S, Yu B, Chen YM, Wang W, Song ZG, Hu Y, Tao ZW, Tian JH, Pei YY, Yuan ML, Zhang YL, Dai  
332 FH, Liu Y, Wang QM, Zheng JJ, Xu L, Holmes EC, Zhang YZ. 2020. A new coronavirus associated with  
333 human respiratory disease in China. *Nature* 579:265-269.
- 334 2. Zhou P, Yang XL, Wang XG, Hu B, Zhang L, Zhang W, Si HR, Zhu Y, Li B, Huang CL, Chen HD, Chen J, Luo Y,  
335 Guo H, Jiang RD, Liu MQ, Chen Y, Shen XR, Wang X, Zheng XS, Zhao K, Chen QJ, Deng F, Liu LL, Yan B,  
336 Zhan FX, Wang YY, Xiao GF, Shi ZL. 2020. A pneumonia outbreak associated with a new coronavirus of  
337 probable bat origin. *Nature* 579:270-273.
- 338 3. Zhu N, Zhang D, Wang W, Li X, Yang B, Song J, Zhao X, Huang B, Shi W, Lu R, Niu P, Zhan F, Ma X, Wang D,  
339 Xu W, Wu G, Gao GF, Tan W, China Novel Coronavirus I, Research T. 2020. A Novel Coronavirus from  
340 Patients with Pneumonia in China, 2019. *N Engl J Med* 382:727-733.
- 341 4. Perlman S, Netland J. 2009. Coronaviruses post-SARS: update on replication and pathogenesis. *Nat Rev*  
342 *Microbiol* 7:439-50.
- 343 5. Li F. 2016. Structure, Function, and Evolution of Coronavirus Spike Proteins. *Annu Rev Virol* 3:237-261.
- 344 6. Wrapp D, Wang N, Corbett KS, Goldsmith JA, Hsieh CL, Abiona O, Graham BS, McLellan JS. 2020.  
345 Cryo-EM structure of the 2019-nCoV spike in the prefusion conformation. *Science* 367:1260-1263.
- 346 7. Walls AC, Park YJ, Tortorici MA, Wall A, McGuire AT, Veesler D. 2020. Structure, Function, and  
347 Antigenicity of the SARS-CoV-2 Spike Glycoprotein. *Cell* doi:10.1016/j.cell.2020.02.058.
- 348 8. Wan Y, Shang J, Graham R, Baric RS, Li F. 2020. Receptor Recognition by the Novel Coronavirus from  
349 Wuhan: an Analysis Based on Decade-Long Structural Studies of SARS Coronavirus. *J Virol* 94.
- 350 9. Walls AC, Tortorici MA, Snijder J, Xiong X, Bosch BJ, Rey FA, Veesler D. 2017. Tectonic conformational  
351 changes of a coronavirus spike glycoprotein promote membrane fusion. *Proc Natl Acad Sci U S A*  
352 114:11157-11162.



- 353 10. Liu S, Xiao G, Chen Y, He Y, Niu J, Escalante CR, Xiong H, Farmar J, Debnath AK, Tien P, Jiang S. 2004.  
354 Interaction between heptad repeat 1 and 2 regions in spike protein of SARS-associated coronavirus:  
355 implications for virus fusogenic mechanism and identification of fusion inhibitors. *Lancet* 363:938-47.
- 356 11. Bosch BJ, van der Zee R, de Haan CA, Rottier PJ. 2003. The coronavirus spike protein is a class I virus  
357 fusion protein: structural and functional characterization of the fusion core complex. *J Virol*  
358 77:8801-11.
- 359 12. He Y. 2013. Synthesized peptide inhibitors of HIV-1 gp41-dependent membrane fusion. *Curr Pharm Des*  
360 19:1800-9.
- 361 13. Lu L, Liu Q, Zhu Y, Chan KH, Qin L, Li Y, Wang Q, Chan JF, Du L, Yu F, Ma C, Ye S, Yuen KY, Zhang R, Jiang S.  
362 2014. Structure-based discovery of Middle East respiratory syndrome coronavirus fusion inhibitor. *Nat*  
363 *Commun* 5:3067.
- 364 14. Wang C, Xia S, Zhang P, Zhang T, Wang W, Tian Y, Meng G, Jiang S, Liu K. 2018. Discovery of  
365 Hydrocarbon-Stapled Short alpha-Helical Peptides as Promising Middle East Respiratory Syndrome  
366 Coronavirus (MERS-CoV) Fusion Inhibitors. *J Med Chem* 61:2018-2026.
- 367 15. Bosch BJ, Martina BE, Van Der Zee R, Lepault J, Haijema BJ, Versluis C, Heck AJ, De Groot R, Osterhaus  
368 AD, Rottier PJ. 2004. Severe acute respiratory syndrome coronavirus (SARS-CoV) infection inhibition  
369 using spike protein heptad repeat-derived peptides. *Proc Natl Acad Sci U S A* 101:8455-60.
- 370 16. Ujike M, Nishikawa H, Otaka A, Yamamoto N, Yamamoto N, Matsuoka M, Kodama E, Fujii N, Taguchi F.  
371 2008. Heptad repeat-derived peptides block protease-mediated direct entry from the cell surface of  
372 severe acute respiratory syndrome coronavirus but not entry via the endosomal pathway. *J Virol*  
373 82:588-92.
- 374 17. Liu JJ, Kao CL, Hsieh SC, Wey MT, Kan LS, Wang WK. 2009. Identification of a minimal peptide derived  
375 from heptad repeat (HR) 2 of spike protein of SARS-CoV and combination of HR1-derived peptides as  
376 fusion inhibitors. *Antiviral Res* 81:82-7.
- 377 18. Aydin H, Al-Khooly D, Lee JE. 2014. Influence of hydrophobic and electrostatic residues on  
378 SARS-coronavirus S2 protein stability: insights into mechanisms of general viral fusion and inhibitor  
379 design. *Protein Sci* 23:603-17.
- 380 19. Xia S, Yan L, Xu W, Agrawal AS, Algaissi A, Tseng CK, Wang Q, Du L, Tan W, Wilson IA, Jiang S, Yang B, Lu  
381 L. 2019. A pan-coronavirus fusion inhibitor targeting the HR1 domain of human coronavirus spike. *Sci*  
382 *Adv* 5:eaav4580.
- 383 20. Zhu Y, Chong H, Yu D, Guo Y, Zhou Y, He Y. 2019. Design and Characterization of Cholesterylated Peptide  
384 HIV-1/2 Fusion Inhibitors with Extremely Potent and Long-Lasting Antiviral Activity. *J Virol*  
385 doi:10.1128/JVI.02312-18.
- 386 21. Chong H, Xue J, Zhu Y, Cong Z, Chen T, Wei Q, Qin C, He Y. 2019. Monotherapy with a low-dose  
387 lipopeptide HIV fusion inhibitor maintains long-term viral suppression in rhesus macaques. *PLoS*  
388 *Pathog* 15:e1007552.
- 389 22. Zhu Y, Zhang X, Ding X, Chong H, Cui S, He J, Wang X, He Y. 2018. Exceptional potency and structural  
390 basis of a T1249-derived lipopeptide fusion inhibitor against HIV-1, HIV-2, and simian  
391 immunodeficiency virus. *J Biol Chem* 293:5323-34.
- 392 23. Chong H, Zhu Y, Yu D, He Y. 2018. Structural and Functional Characterization of Membrane Fusion  
393 Inhibitors with Extremely Potent Activity against HIV-1, HIV-2, and Simian Immunodeficiency Virus. *J*  
394 *Virol* 92:e01088-18.
- 395 24. Chong H, Xue J, Zhu Y, Cong Z, Chen T, Guo Y, Wei Q, Zhou Y, Qin C, He Y. 2018. Design of Novel HIV-1/2  
396 Fusion Inhibitors with High Therapeutic Efficacy in Rhesus Monkey Models. *J Virol* 92:e00775-18.

- 397 25. Chong H, Xue J, Xiong S, Cong Z, Ding X, Zhu Y, Liu Z, Chen T, Feng Y, He L, Guo Y, Wei Q, Zhou Y, Qin C,  
398 He Y. 2017. A Lipopeptide HIV-1/2 Fusion Inhibitor with Highly Potent In Vitro, Ex Vivo, and In Vivo  
399 Antiviral Activity. *J Virol* 91:e00288-17.
- 400 26. He Y, Zhou Y, Siddiqui P, Niu J, Jiang S. 2005. Identification of immunodominant epitopes on the  
401 membrane protein of the severe acute respiratory syndrome-associated coronavirus. *J Clin Microbiol*  
402 43:3718-26.
- 403 27. He Y, Zhou Y, Wu H, Luo B, Chen J, Li W, Jiang S. 2004. Identification of immunodominant sites on the  
404 spike protein of severe acute respiratory syndrome (SARS) coronavirus: implication for developing SARS  
405 diagnostics and vaccines. *J Immunol* 173:4050-7.
- 406 28. He Y, Zhou Y, Wu H, Kou Z, Liu S, Jiang S. 2004. Mapping of antigenic sites on the nucleocapsid protein  
407 of the severe acute respiratory syndrome coronavirus. *J Clin Microbiol* 42:5309-14.
- 408 29. Cao Z, Liu L, Du L, Zhang C, Jiang S, Li T, He Y. 2010. Potent and persistent antibody responses against  
409 the receptor-binding domain of SARS-CoV spike protein in recovered patients. *Virol J* 7:299.
- 410 30. He Y, Barker SJ, MacDonald AJ, Yu Y, Cao L, Li J, Parhar R, Heck S, Hartmann S, Golenbock DT, Jiang S,  
411 Libri NA, Semper AE, Rosenberg WM, Lustigman S. 2009. Recombinant Ov-ASP-1, a Th1-biased protein  
412 adjuvant derived from the helminth *Onchocerca volvulus*, can directly bind and activate  
413 antigen-presenting cells. *J Immunol* 182:4005-16.
- 414 31. He Y, Li J, Li W, Lustigman S, Farzan M, Jiang S. 2006. Cross-neutralization of human and palm civet  
415 severe acute respiratory syndrome coronaviruses by antibodies targeting the receptor-binding domain  
416 of spike protein. *J Immunol* 176:6085-92.
- 417 32. He Y, Li J, Jiang S. 2006. A single amino acid substitution (R441A) in the receptor-binding domain of  
418 SARS coronavirus spike protein disrupts the antigenic structure and binding activity. *Biochem Biophys*  
419 *Res Commun* 344:106-13.
- 420 33. He Y, Li J, Heck S, Lustigman S, Jiang S. 2006. Antigenic and immunogenic characterization of  
421 recombinant baculovirus-expressed severe acute respiratory syndrome coronavirus spike protein:  
422 implication for vaccine design. *J Virol* 80:5757-67.
- 423 34. He Y, Li J, Du L, Yan X, Hu G, Zhou Y, Jiang S. 2006. Identification and characterization of novel  
424 neutralizing epitopes in the receptor-binding domain of SARS-CoV spike protein: revealing the critical  
425 antigenic determinants in inactivated SARS-CoV vaccine. *Vaccine* 24:5498-508.
- 426 35. He Y. 2006. Immunogenicity of SARS-CoV: the receptor-binding domain of S protein is a major target of  
427 neutralizing antibodies. *Adv Exp Med Biol* 581:539-42.
- 428 36. He Y, Zhu Q, Liu S, Zhou Y, Yang B, Li J, Jiang S. 2005. Identification of a critical neutralization  
429 determinant of severe acute respiratory syndrome (SARS)-associated coronavirus: importance for  
430 designing SARS vaccines. *Virology* 334:74-82.
- 431 37. He Y, Lu H, Siddiqui P, Zhou Y, Jiang S. 2005. Receptor-binding domain of severe acute respiratory  
432 syndrome coronavirus spike protein contains multiple conformation-dependent epitopes that induce  
433 highly potent neutralizing antibodies. *J Immunol* 174:4908-15.
- 434 38. He Y, Jiang S. 2005. Vaccine design for severe acute respiratory syndrome coronavirus. *Viral Immunol*  
435 18:327-32.
- 436 39. He Y, Zhou Y, Siddiqui P, Jiang S. 2004. Inactivated SARS-CoV vaccine elicits high titers of spike  
437 protein-specific antibodies that block receptor binding and virus entry. *Biochem Biophys Res Commun*  
438 325:445-52.
- 439 40. He Y, Zhou Y, Liu S, Kou Z, Li W, Farzan M, Jiang S. 2004. Receptor-binding domain of SARS-CoV spike  
440 protein induces highly potent neutralizing antibodies: implication for developing subunit vaccine.

- 441 Biochem Biophys Res Commun 324:773-81.
- 442 41. Li W, Moore MJ, Vasilieva N, Sui J, Wong SK, Berne MA, Somasundaran M, Sullivan JL, Luzuriaga K,  
443 Greenough TC, Choe H, Farzan M. 2003. Angiotensin-converting enzyme 2 is a functional receptor for  
444 the SARS coronavirus. *Nature* 426:450-4.
- 445 42. Li F, Li W, Farzan M, Harrison SC. 2005. Structure of SARS coronavirus spike receptor-binding domain  
446 complexed with receptor. *Science* 309:1864-8.
- 447 43. Glowacka I, Bertram S, Muller MA, Allen P, Soilleux E, Pfefferle S, Steffen I, Tsegaye TS, He Y, Gnirss K,  
448 Niemeyer D, Schneider H, Drosten C, Pohlmann S. 2011. Evidence that TMPRSS2 activates the severe  
449 acute respiratory syndrome coronavirus spike protein for membrane fusion and reduces viral control  
450 by the humoral immune response. *J Virol* 85:4122-34.
- 451 44. Shulla A, Heald-Sargent T, Subramanya G, Zhao J, Perlman S, Gallagher T. 2011. A transmembrane  
452 serine protease is linked to the severe acute respiratory syndrome coronavirus receptor and activates  
453 virus entry. *J Virol* 85:873-82.
- 454 45. Simmons G, Gosalia DN, Rennekamp AJ, Reeves JD, Diamond SL, Bates P. 2005. Inhibitors of cathepsin L  
455 prevent severe acute respiratory syndrome coronavirus entry. *Proc Natl Acad Sci U S A* 102:11876-81.
- 456 46. Iwata-Yoshikawa N, Okamura T, Shimizu Y, Hasegawa H, Takeda M, Nagata N. 2019. TMPRSS2  
457 Contributes to Virus Spread and Immunopathology in the Airways of Murine Models after Coronavirus  
458 Infection. *J Virol* 93.
- 459 47. Kawase M, Shirato K, van der Hoek L, Taguchi F, Matsuyama S. 2012. Simultaneous treatment of human  
460 bronchial epithelial cells with serine and cysteine protease inhibitors prevents severe acute respiratory  
461 syndrome coronavirus entry. *J Virol* 86:6537-45.
- 462 48. Zhou Y, Vedantham P, Lu K, Agudelo J, Carrion R, Jr., Nunneley JW, Barnard D, Pohlmann S, McKerrow  
463 JH, Renslo AR, Simmons G. 2015. Protease inhibitors targeting coronavirus and filovirus entry. *Antiviral  
464 Res* 116:76-84.
- 465 49. Follis KE, York J, Nunberg JH. 2006. Furin cleavage of the SARS coronavirus spike glycoprotein enhances  
466 cell-cell fusion but does not affect virion entry. *Virology* 350:358-69.
- 467 50. Kleine-Weber H, Elzayat MT, Hoffmann M, Pohlmann S. 2018. Functional analysis of potential cleavage  
468 sites in the MERS-coronavirus spike protein. *Sci Rep* 8:16597.
- 469 51. Park JE, Li K, Barlan A, Fehr AR, Perlman S, McCray PB, Jr., Gallagher T. 2016. Proteolytic processing of  
470 Middle East respiratory syndrome coronavirus spikes expands virus tropism. *Proc Natl Acad Sci U S A*  
471 113:12262-12267.
- 472 52. Hoffmann M, Kleine-Weber H, Schroeder S, Kruger N, Herrler T, Erichsen S, Schiergens TS, Herrler G,  
473 Wu NH, Nitsche A, Muller MA, Drosten C, Pohlmann S. 2020. SARS-CoV-2 Cell Entry Depends on ACE2  
474 and TMPRSS2 and Is Blocked by a Clinically Proven Protease Inhibitor. *Cell*  
475 doi:10.1016/j.cell.2020.02.052.
- 476 53. Shirato K, Kanou K, Kawase M, Matsuyama S. 2017. Clinical Isolates of Human Coronavirus 229E Bypass  
477 the Endosome for Cell Entry. *J Virol* 91.
- 478 54. Shirato K, Kawase M, Matsuyama S. 2018. Wild-type human coronaviruses prefer cell-surface TMPRSS2  
479 to endosomal cathepsins for cell entry. *Virology* 517:9-15.
- 480 55. Baron SA, Devaux C, Colson P, Raoult D, Rolain JM. 2020. Teicoplanin: an alternative drug for the  
481 treatment of coronavirus COVID-19? *Int J Antimicrob Agents*  
482 doi:10.1016/j.ijantimicag.2020.105944:105944.
- 483 56. Zhang J MX, Yu F, Liu J, Zou F, Pan T, Zhang H. Teicoplanin potentially blocks the cell entry of 2019-nCoV.  
484 *BioRxiv*2020:20200205935387 <https://doi.org/10.1101/2020.02.05.935387>.

- 485 57. Wang M, Cao R, Zhang L, Yang X, Liu J, Xu M, Shi Z, Hu Z, Zhong W, Xiao G. 2020. Remdesivir and  
486 chloroquine effectively inhibit the recently emerged novel coronavirus (2019-nCoV) in vitro. *Cell Res*  
487 30:269-271.
- 488 58. Martinez MA. 2020. Compounds with therapeutic potential against novel respiratory 2019 coronavirus.  
489 *Antimicrob Agents Chemother* doi:10.1128/AAC.00399-20.
- 490 59. Gautret P, Lagier JC, Parola P, Hoang VT, Meddeb L, Mailhe M, Doudier B, Courjon J, Giordanengo V,  
491 Vieira VE, Dupont HT, Honore S, Colson P, Chabriere E, La Scola B, Rolain JM, Brouqui P, Raoult D. 2020.  
492 Hydroxychloroquine and azithromycin as a treatment of COVID-19: results of an open-label  
493 non-randomized clinical trial. *Int J Antimicrob Agents* doi:10.1016/j.ijantimicag.2020.105949:105949.
- 494 60. Zhu Y, Ding X, Yu D, Chong H, He Y. 2019. The Tryptophan-Rich Motif of HIV-1 Gp41 Can Interact with  
495 the N-Terminal Deep Pocket Site: New Insights into the Structure and Function of Gp41 and Its  
496 Inhibitors. *J Virol* doi:10.1128/JVI.01358-19.
- 497 61. Zhang X, Ding X, Zhu Y, Chong H, Cui S, He J, Wang X, He Y. 2019. Structural and functional  
498 characterization of HIV-1 cell fusion inhibitor T20. *AIDS* 33:1-11.
- 499  
500

501 **Figure legends**

502 **Figure 1. Schematic diagram of SARS-CoV-2 S protein and its peptide derivatives. (A)**

503 Functional domains of the S protein. SP, signal peptide; NTD, N-terminal domain; RBD,  
504 receptor-binding domain; SD, subdomain; FP, fusion peptide; HR1, heptad repeat 1; CH,  
505 central helix; CD, connector domain; HR2, heptad repeat 2; TM, transmembrane domain; CT,  
506 cytoplasmic tail. The S1/S2 cleavage site (685/686) is marked. The HR1 and HR2 sequences  
507 and membrane proximal external sequence (MPES) are listed. **(B)** HR2-derived fusion  
508 inhibitor peptides. chol, cholesterol.

509

510 **Figure 2. Functional characterization of the SARS-CoV-2 and SARS-CoV S proteins. (A)**

511 Infectivity of the SARS-CoV-2 and SARS-CoV pseudoviruses in 293T cells or 293T/ACE2  
512 cells was determined by a single-cycle infection assay. **(B)** Fusogenic activity of the  
513 SARS-CoV-2 and SARS-CoV S proteins with 293T cells or 293T/ACE2 cells as a target was  
514 determined by a DSP-based cell fusion assay. The fusion activity of S proteins in 293T cells  
515 **(C)** and 293T/ACE2 cells **(D)** were determined at different time points. The experiments were  
516 repeated three times, and data are expressed as means  $\pm$  standard deviations.

517

518 **Figure 3. The interactions between the HR1 and HR2 peptides derived from the S2**

519 **proteins of SARS-CoV-2 and SARS-CoV. (A)** Sequence comparison of the HR1 and HR2

520 domains in SARS-CoV-2 and SARS-CoV. The  $\alpha$ -helicity and thermostability of the HR1

521 peptides alone **(B and C)** or in complexes with a HR2 peptide **(D and E)** were determined by

522 CD spectroscopy, in which the peptides or peptide mixture were dissolved in PBS with a final

523 concentration of each peptide at 10  $\mu$ M. The experiments were performed two times, and  
524 representative data are shown.

525

526 **Figure 4. Secondary structure and binding stability of fusion inhibitor peptides**  
527 **determined by CD spectroscopy.** The  $\alpha$ -helicity and thermostability of peptide inhibitors  
528 alone (**A** and **B**) or in complexes with the SARS-CoV-2 HR1 peptide (**C** and **D**) or  
529 SARS-CoV HR1 peptide (**E** and **F**) were detected with a final concentration of each peptide  
530 at 10  $\mu$ M. The experiments were performed two times, and representative data are shown.

531

532 **Figure 5. Visualization of the interactions between HR1 peptides and inhibitors by native**  
533 **PAGE analysis.** Each of the peptides was used at a final concentration of 40 $\mu$ M. The  
534 positively charged peptides SARS2NP and SARS1NP migrated up and off the gel, thus no  
535 bands appeared. IPB01 or IPB02 alone and their complexes with SARS2NP or SARS1NP  
536 displayed specific bands because of their net negative charges. The experiments were repeated  
537 two times, and representative data are shown.

538

539 **Figure 6. Inhibitory activity of IPB01 and IPB02 against SARS-CoV-2 and SARS-CoV.**

540 (**A**) Inhibition of inhibitors on the SARS-CoV-2 S protein-mediated cell-cell fusion  
541 determined by a DSP-based cell fusion assay. The activity of IPB01 and IPB02 in inhibiting  
542 SARS-CoV-2 (**B**) and SARS-CoV (**C**) and a control pseudovirus VSV-G (**D**) was determined  
543 by a single-cycle infection assay. The experiments were repeated three times, and data are  
544 expressed as means  $\pm$  standard deviations.



546 Fig. 1

547

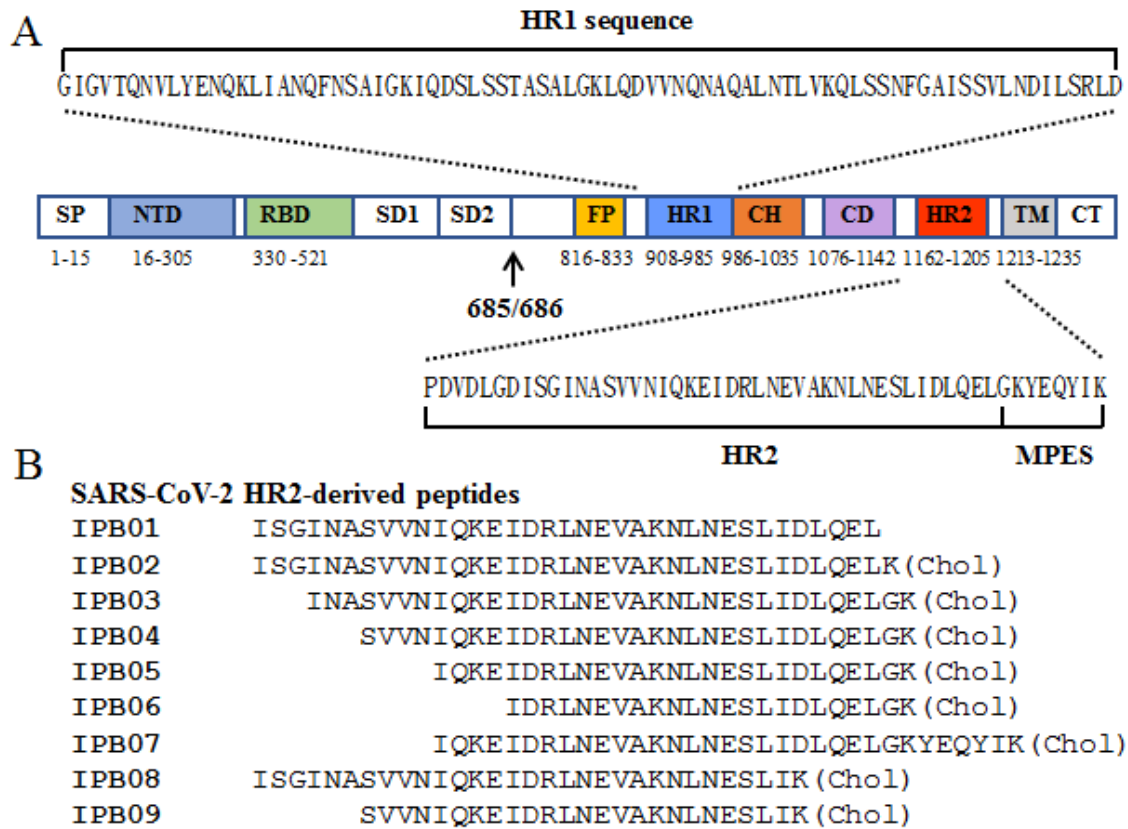

548

549



550 Fig. 2

551

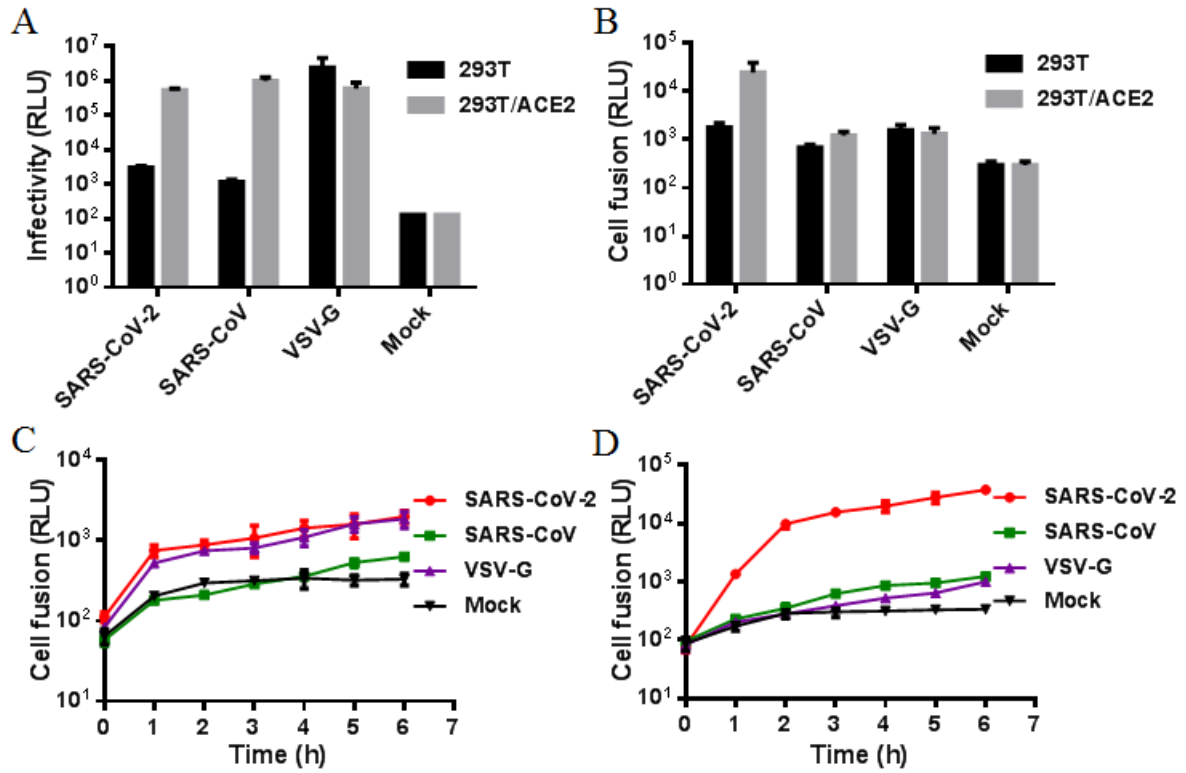

552

553

554 Fig. 3

555

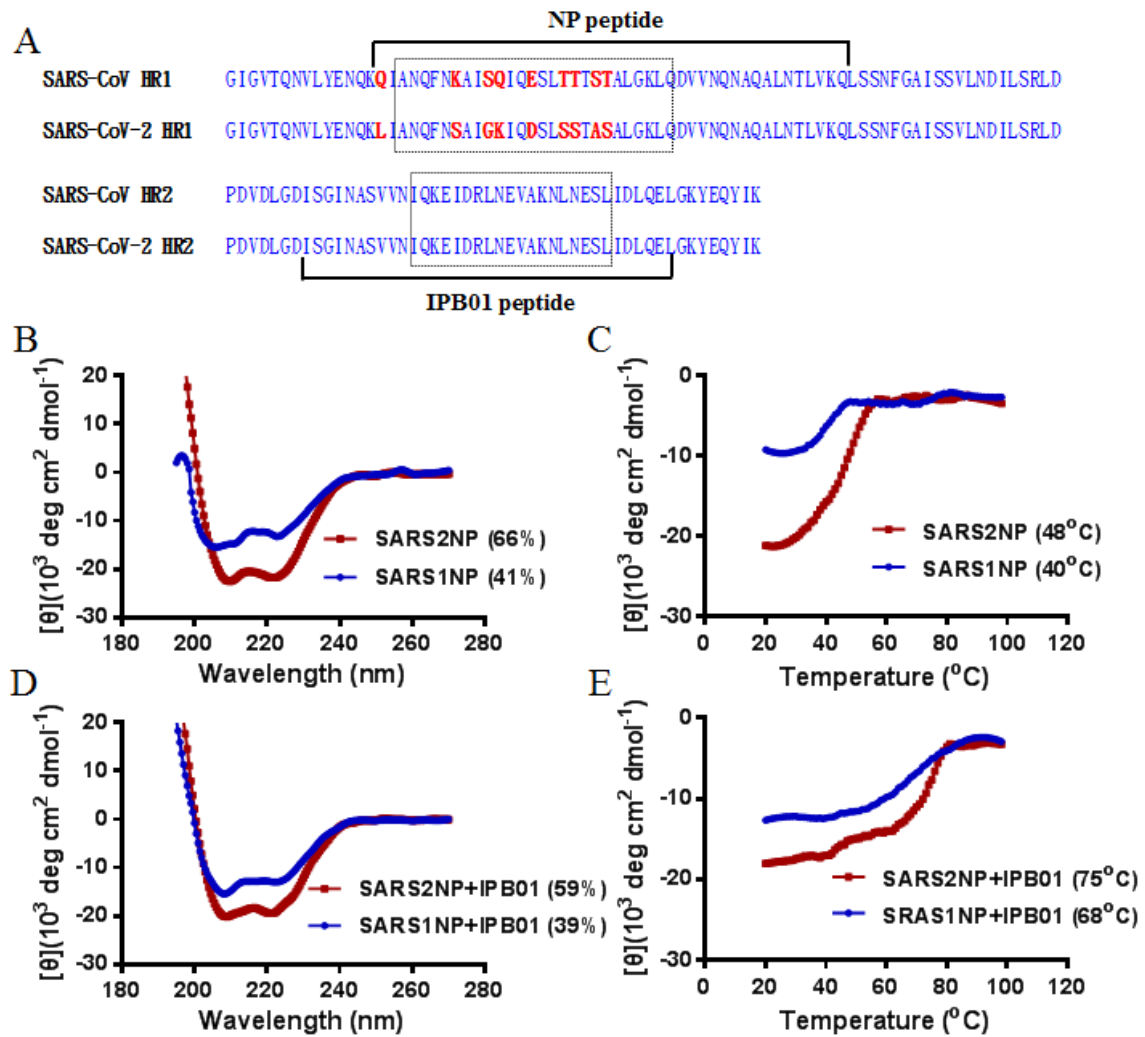

556

557

558

559 Fig. 4

560

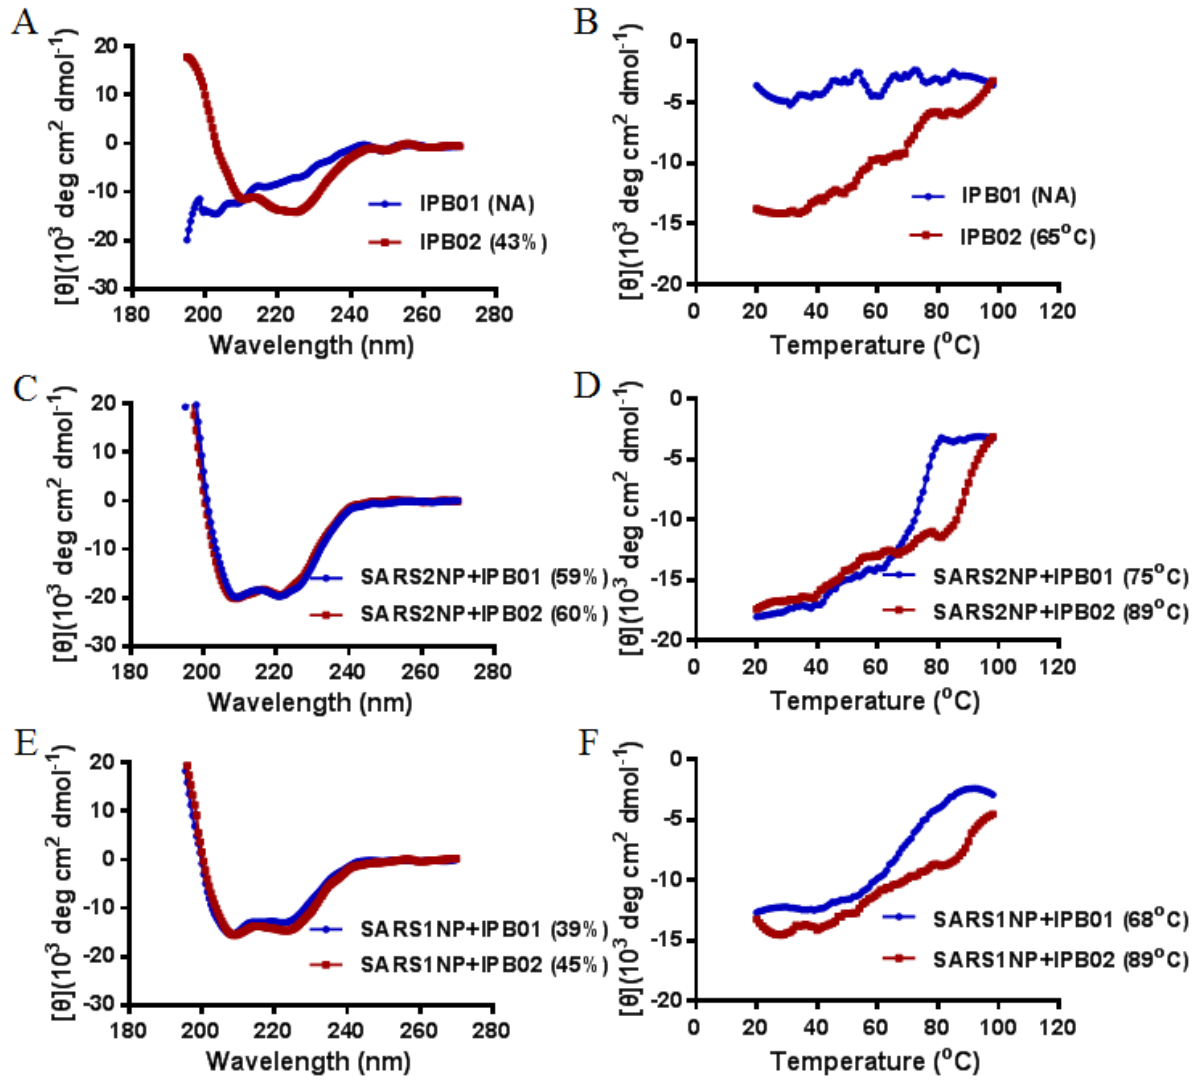

561

562

563 Fig. 5

564

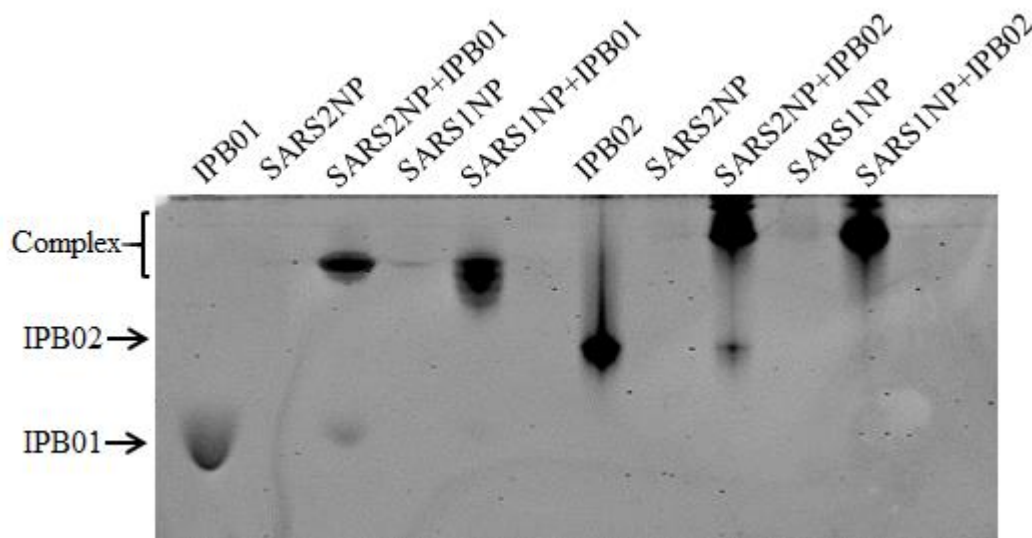

565

566

567 Fig. 6

568

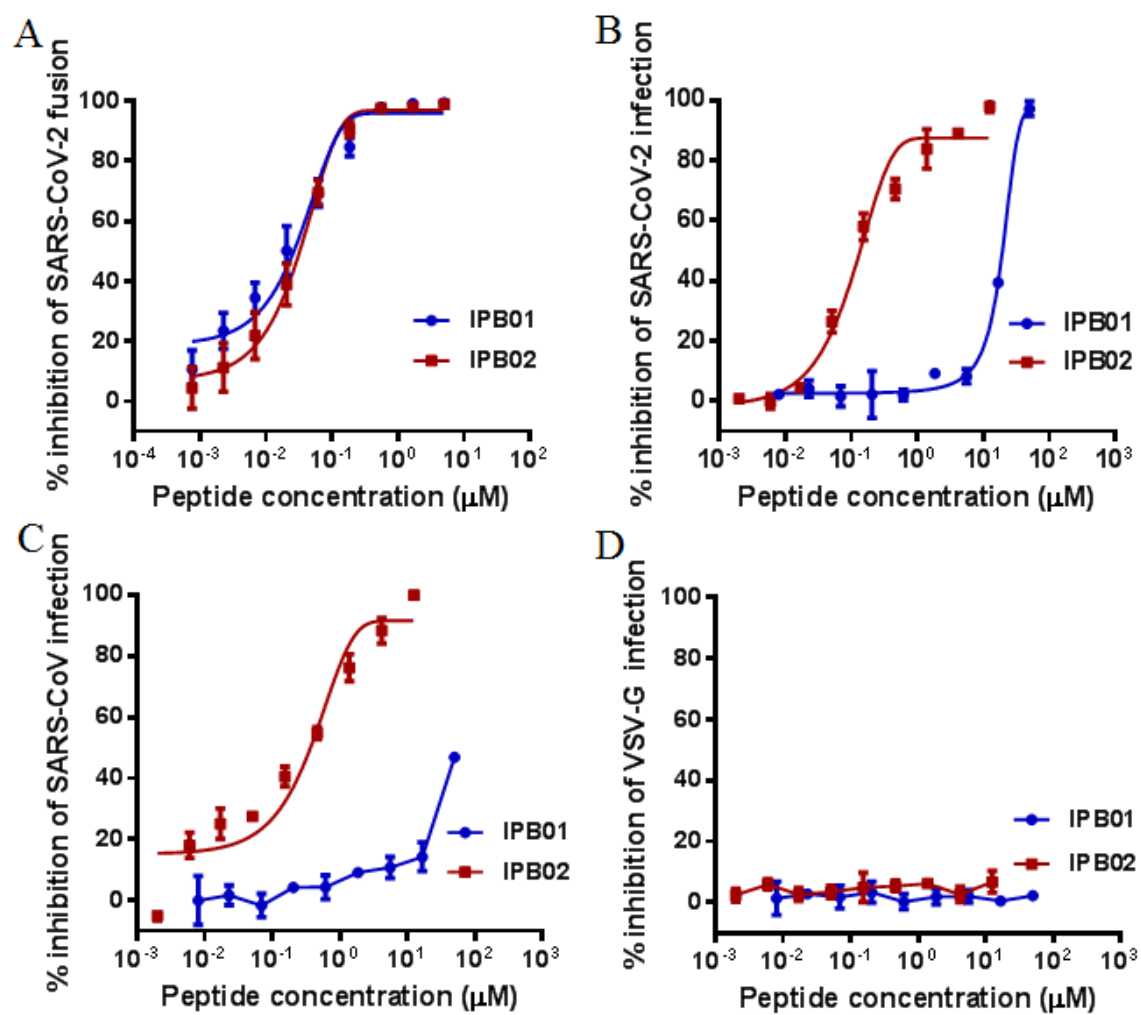

569

570

571

572 **Table 1. Structural and functional characterization of lipopeptide fusion inhibitors**  
573 **against SARS-CoV-2 and SARS-CoV**

| Inhibitor | Inhibitory activity (IC <sub>50</sub> , $\mu$ M) |                    |                   |          | Helix content (%) |         | T <sub>m</sub> (°C) |         |
|-----------|--------------------------------------------------|--------------------|-------------------|----------|-------------------|---------|---------------------|---------|
|           | SARS-CoV-2 fusion                                | SARS-CoV-2 PV      | SARS-CoV PV       | VSV-G PV | SARS2NP           | SARS1NP | SARS2NP             | SARS1NP |
| IPB01     | 0.022 $\pm$ 0.005                                | 33.74 $\pm$ 11.827 | >50               | >50      | 59                | 39      | 75                  | 68      |
| IPB02     | 0.025 $\pm$ 0.002                                | 0.08 $\pm$ 0.017   | 0.251 $\pm$ 0.118 | >50      | 60                | 45      | 89                  | 89      |
| IPB03     | 0.015 $\pm$ 0.002                                | 0.947 $\pm$ 0.179  | 1.315 $\pm$ 0.463 | >50      | 50                | 34      | 47                  | 46      |
| IPB04     | 0.033 $\pm$ 0.013                                | 0.218 $\pm$ 0.063  | 1.053 $\pm$ 0.444 | >50      | 60                | 49      | 77                  | 77      |
| IPB05     | >5                                               | >25                | >25               | >50      | ND                | ND      | ND                  | ND      |
| IPB06     | >5                                               | >25                | >25               | >50      | ND                | ND      | ND                  | ND      |
| IPB07     | 0.017 $\pm$ 0.001                                | 0.993 $\pm$ 0.08   | 1.037 $\pm$ 0.836 | >50      | 55                | 33      | 47                  | 45      |
| IPB08     | 4.66 $\pm$ 1.565                                 | 1.738 $\pm$ 0.898  | 1.13 $\pm$ 0.472  | >50      | ND                | ND      | ND                  | ND      |
| IPB09     | >5                                               | >25                | >25               | >50      | ND                | ND      | ND                  | ND      |

574

575 \*The antiviral assays were repeated three times, and data are expressed as means  $\pm$  standard  
576 deviations. The CD experiment was repeated two times and representative data are shown.  
577 ND means “not done” owing to the solubility problem of the peptides in PBS.
